# Supplementary material
Source: publisher figshare collection journal article supplement (https://acs.figshare.com/ndownloader/files/21940173)
Supplement: Supplementary file 1 [file 21940173]

## SUPPORTING INFORMATION

### *In-situ* Growth of Porous Ultrathin Ni(OH)<sub>2</sub> Nanostructures On Nickel Foam: An Efficient and Durable Catalysts for Urea Electrolysis

Liaoyuan Xia, <sup>\*a1</sup> Yu Liao, <sup>a1</sup> Yan Qing, <sup>a</sup> Han Xu, <sup>\*a, b</sup> Zhifei Gao, <sup>a</sup> Wanqian Li, <sup>a</sup> Yiqiang Wu, <sup>\*a</sup>

*a. Hunan Province Key Laboratory of Materials Surface & Interface Science and Technology, College of Material Science and Engineering, Central South University of Forestry and Technology, Changsha, 410004, China.*

*b. School of Materials Science and Energy Engineering, Foshan University, Foshan, Guangdong, 528000, P. R. China.*

\*CORRESPONDING AUTHOR.

E-mail addresses: *xly1516@126.com* (Liaoyuan Xia), *xuh@csuft.edu.cn* (Han Xu), *wuyq0506@126.com* (Yiqiang Wu); (phone & fax) +86-739-85658531.

## Section 1

### 1. Preparation of the Ni(OH)<sub>2</sub>/NF catalysts

**(1) Ni(OH)<sub>2</sub>/NF-E:** Ni(OH)<sub>2</sub> loaded on NF (0.5 cm×2.0 cm) was prepared using the reported electrodeposition methods (denoted as Ni(OH)<sub>2</sub>/NF-E).<sup>[1]</sup> A piece of NF was rinsed with ethanol and UP water, respectively. And then, the electrodeposition was carried out in a simple two-electrode cell by galvanostatic electrolysis. The NF was used as working electrode and a graphite electrode (spectral grade, 1.8 cm<sup>2</sup>) was used as the counter electrode. The Ni(OH)<sub>2</sub>/NF-E was obtained by an electrodeposition with a current density of 0.5 mA cm<sup>-2</sup> for 30 min in a mixed solution of 9.0 mM Ni(NO<sub>3</sub>)<sub>2</sub>·6H<sub>2</sub>O and 0.02 mM NH<sub>4</sub>NO<sub>3</sub> at room temperature, and finally dried in the air.

**(2) Ni(OH)<sub>2</sub>/NF-H:** Ni(OH)<sub>2</sub> nanosheet arrays were synthesized on NF (3.0 cm×2.0 cm) by a simple hydrothermal reaction (denoted as Ni(OH)<sub>2</sub>/NF-H) according to Liu et al.<sup>[2]</sup> In brief, the pre-cleaned NF was immersed into a 40 mL of HCl solution with pH = 3.0, and then transferred into a 50 mL Teflon-lined stainless-steel autoclave. The autoclave was maintained at 180 °C for 6 h. After cooling naturally to room temperature, the sample was collected and washed for several times with deionized water, and further dried at 60 °C in vacuum for 12 h.

### References

- [1] A.-L. Wang, H. Xu, G.-R. Li, *ACS Energy Lett.* **2016**, 1, 445.
- [2] G. Liu, Z. Sun, X. Zhang, H. Wang, G. Wang, X. Wu, H. Zhang, H. Zhao, *J. Mater. Chem. A* **2018**, 6, 19201.

## Section 2

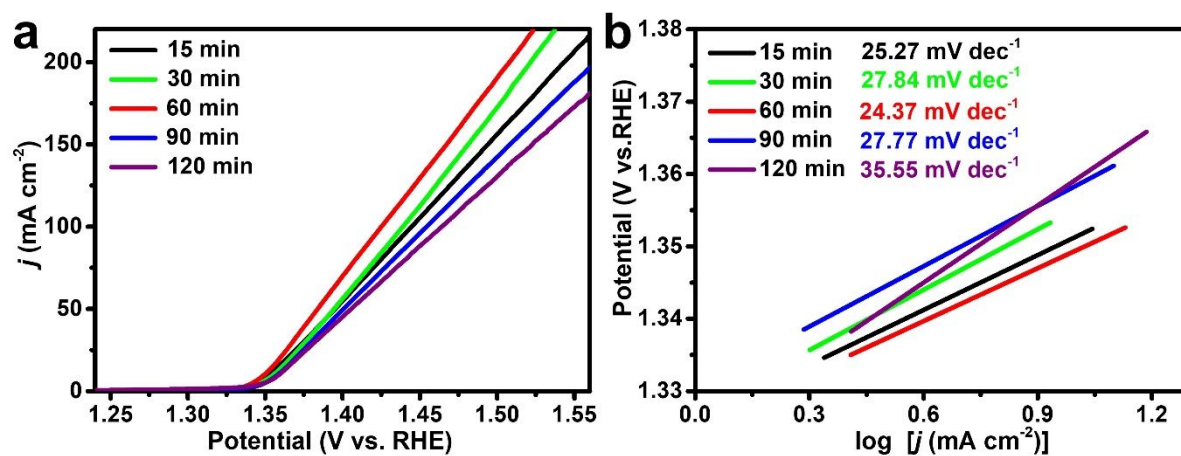

**Figure S1.** (a) LSV curves and (b) Tafel plots of Ni(OH)<sub>2</sub>@NF with different activation time.

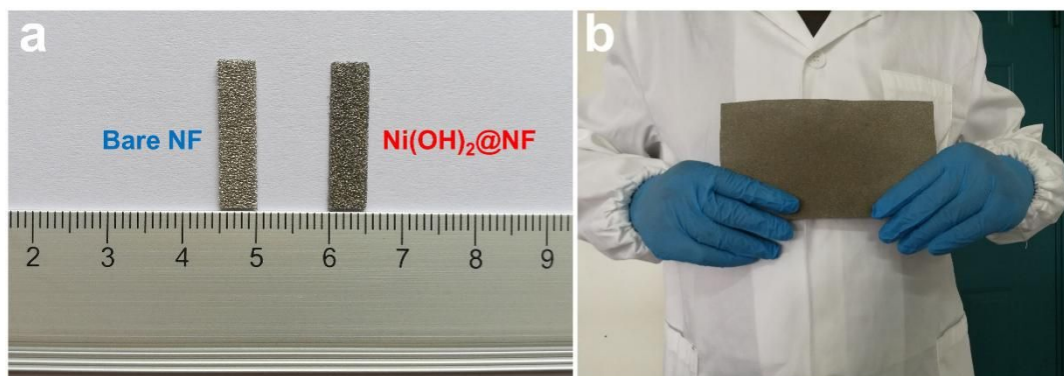

**Figure S2.** Optical images of bare NF and Ni(OH)<sub>2</sub>@NF.

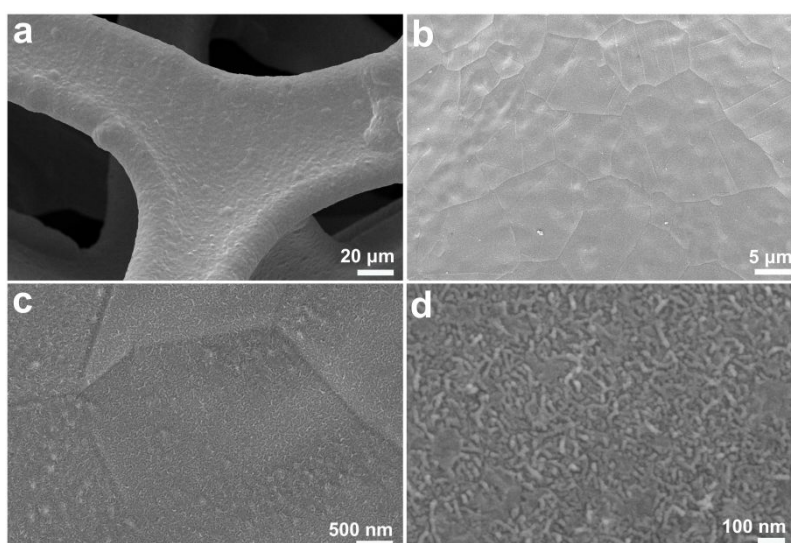

**Figure S3.** SEM images of bare NF.

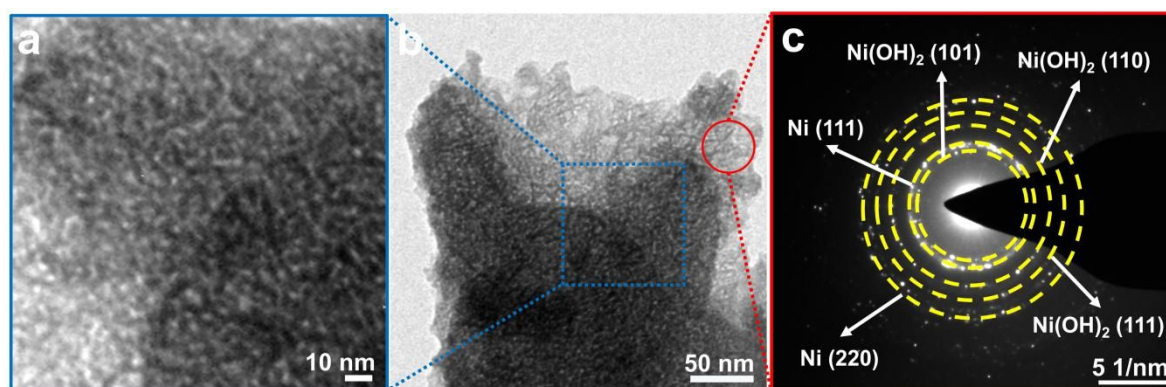

**Figure S4.** (a, b) TEM images of the Ni(OH)<sub>2</sub>@NF; (c) Selected area electron diffraction pattern of the Ni(OH)<sub>2</sub>@NF.

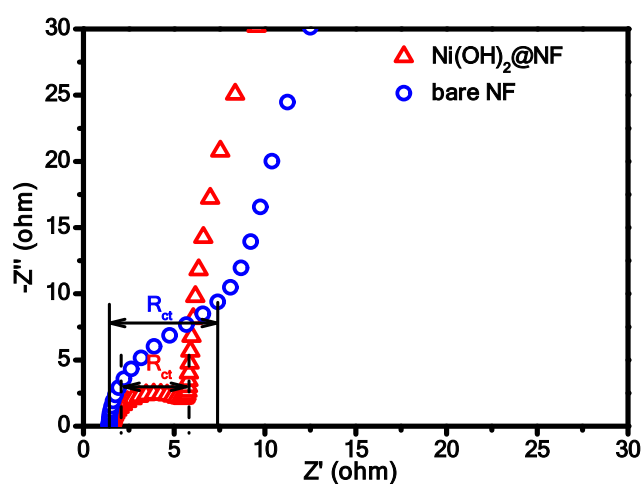

**Figure S5.** Nyquist plots of bare NF and Ni(OH)<sub>2</sub>@NF samples.

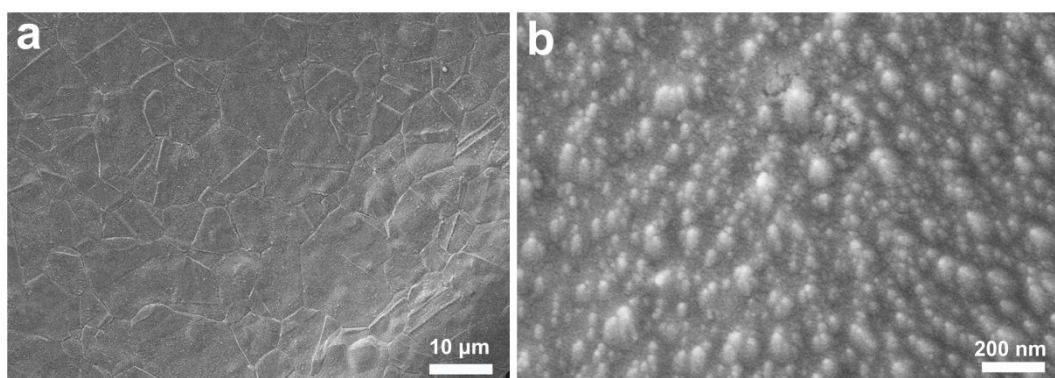

**Figure S6.** (a, b) SEM images of the Ni(OH)<sub>2</sub>@NF after long-term electrolysis for UOR.

The SEM images with different magnification in Figure S6 reveal that the morphology and microstructure of Ni(OH)<sub>2</sub>@NF not only remained unchanged after the UOR durability test.

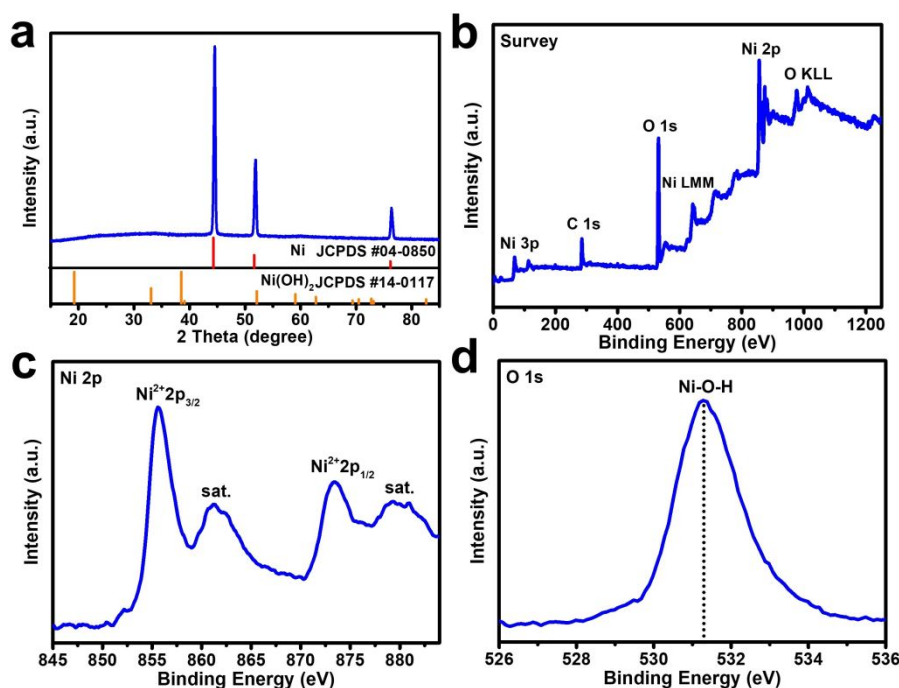

**Figure S7.** (a) XRD pattern of the  $\text{Ni(OH)}_2\text{@NF}$  after long-term electrolysis for UOR; (b) Survey XPS spectra and high resolution XPS spectra of (c) Ni 2p, and (d) O 1s of the  $\text{Ni(OH)}_2\text{@NF}$  after long-term electrolysis for UOR.

As shown in Figure S7, the XRD and XPS analysis results of the  $\text{Ni(OH)}_2\text{@NF}$  catalyst show that its chemical composition and chemical state remain unchanged after a long-term stability test, which indicates that the  $\text{Ni(OH)}_2\text{@NF}$  has a good stability. However, the peak of  $\text{Ni}^0$  2p after UOR stability test was disappeared, its may due to a part of the surface metallic nickel of  $\text{Ni(OH)}_2\text{@NF}$  was oxidized after continuous UOR test.

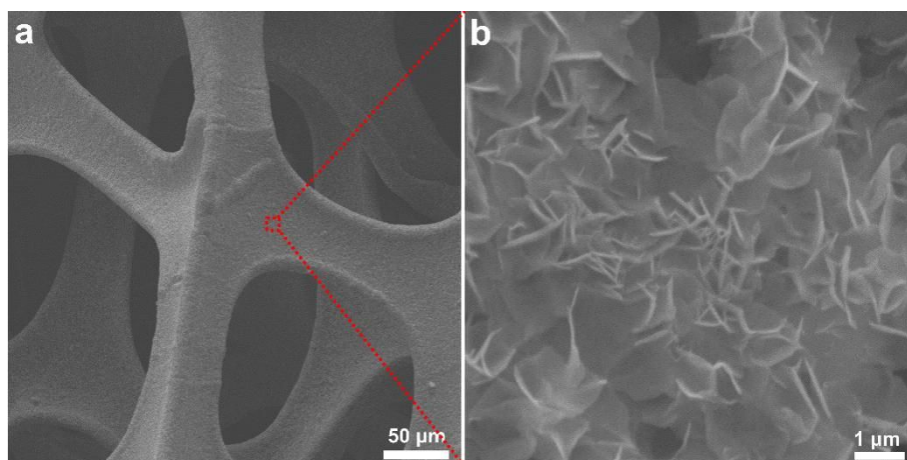

**Figure S8.** SEM images of the  $\text{Ni(OH)}_2\text{/NF-E}$ .

The low-magnification SEM image in (Figure S8a) displayed the surface of NF completely coverage by Ni(OH)<sub>2</sub> nanosheets, and the high-magnification SEM image (Figure S8b) further reveals that Ni(OH)<sub>2</sub> nanosheets are well-aligned and vertically grown on the NF surface.

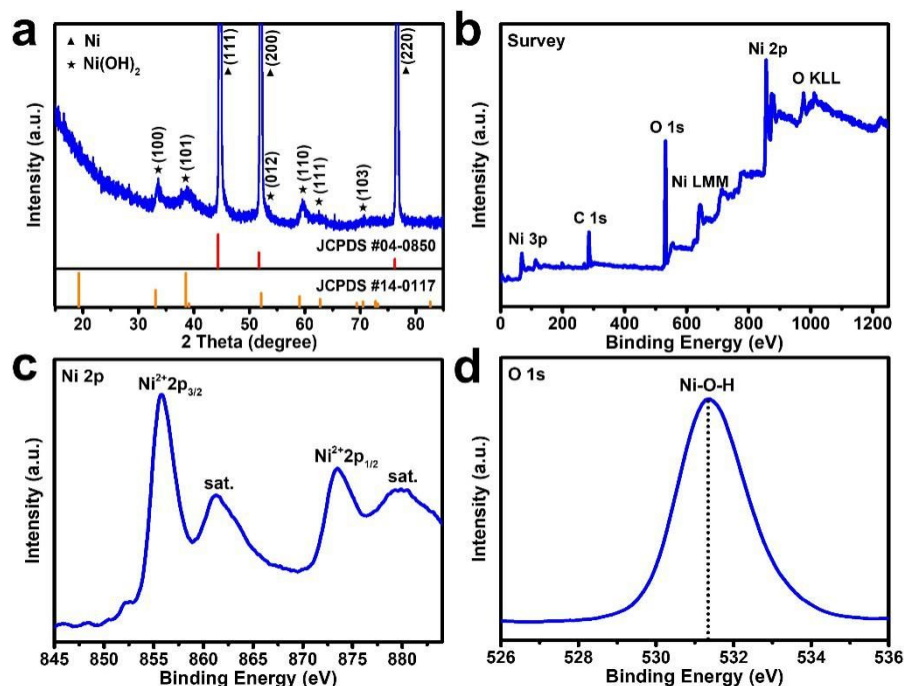

**Figure S9.** (a) XRD pattern of Ni(OH)<sub>2</sub>/NF-E; (b) Survey XPS spectra of Ni(OH)<sub>2</sub>/NF-E; high resolution XPS spectra of (c) Ni 2p, and (d) O 1s of Ni(OH)<sub>2</sub>/NF-E.

As reflected in the XRD pattern (Figure S9a), except for the three typical peaks arise from the NF substrate (JCPDS No. 04-0850), other well-defined peaks corresponding to the composition Ni(OH)<sub>2</sub> (JCPDS No. 14-0117). The XPS survey spectra of the as prepared Ni(OH)<sub>2</sub>/NF-E (shown in Figure S9b) indicated the presence of Ni and O, and the C 1s signal is due to the extraneous carbon contamination. The Ni 2p spectrum (Figure S9c) is divided into Ni 2p<sub>3/2</sub> (855.8 eV) and its satellite (861.4 eV), and Ni 2p<sub>1/2</sub> (873.4 eV) and its satellite (879.5 eV). In the O1s spectrum (Figure S9d), the peaks at 531.4 eV can be ascribed to the Ni-O-H bond. All these results fully confirming that the Ni(OH)<sub>2</sub> is uniformly grown upon the surface of NF.



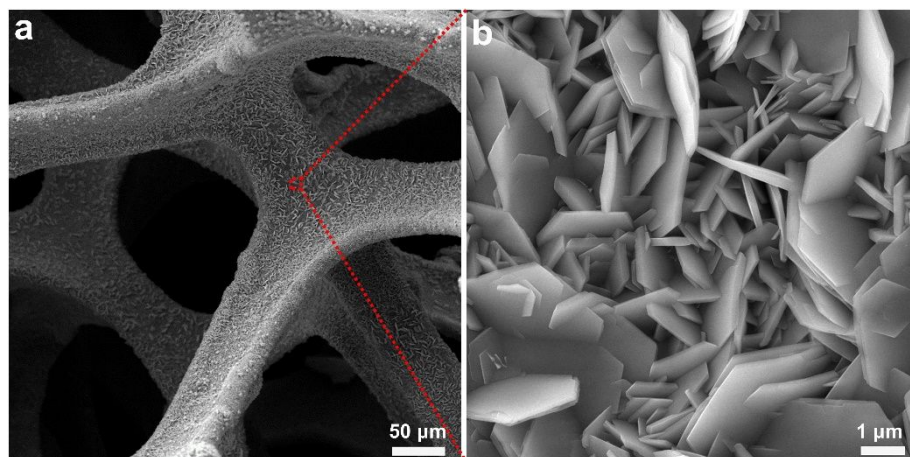

**Figure S10.** SEM images of the Ni(OH)<sub>2</sub>/NF-H.

It can be seen that the surface of NF is completely covered by Ni(OH)<sub>2</sub> nanosheets (Figure S10a) after the hydrothermal reaction. The nanosheet is vertically grown and is interlinked from a perfect porous configuration with a network construction (Figure S10b).

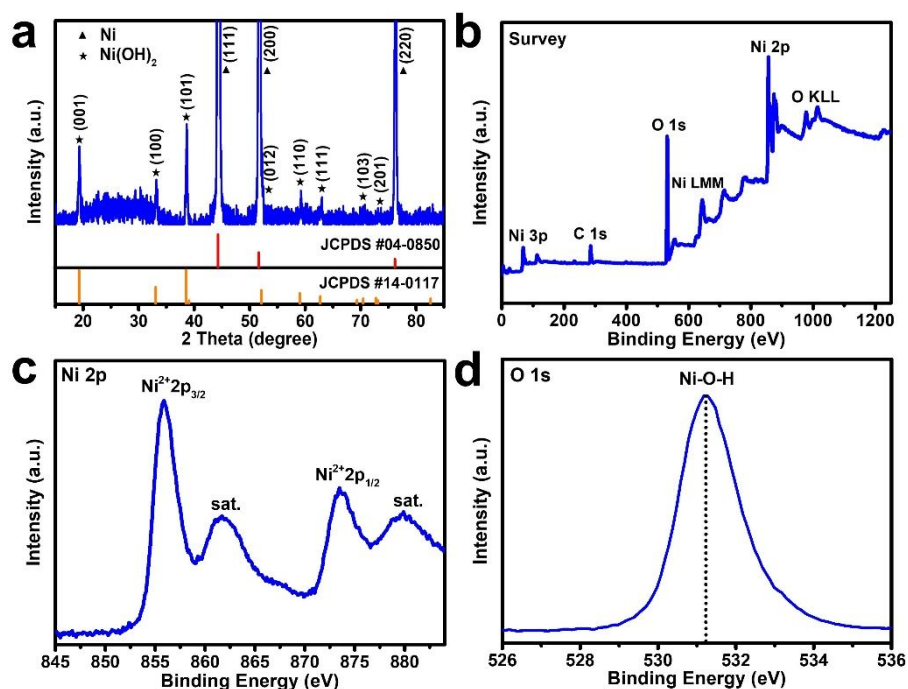

**Figure S11.** (a) XRD pattern of Ni(OH)<sub>2</sub>/NF-H; (b) Survey XPS spectra of Ni(OH)<sub>2</sub>/NF-H; high resolution XPS spectra of (c) Ni 2p, and (d) O 1s of Ni(OH)<sub>2</sub>/NF-H.

As shown in Figure S11a, the XRD pattern of Ni(OH)<sub>2</sub>/NF-H except for the three typical peaks of Ni (JCPDS No. 04-0850) arise from the NF substrate; other well-defined peaks are

assigned to the composition of  $\text{Ni(OH)}_2$  (JCPDS No. 14-0117). The XPS survey spectra of the as prepared  $\text{Ni(OH)}_2/\text{NF-H}$  (shown in Figure S11b) indicates the presence of Ni and O, and the C 1s signal is due to the extraneous carbon contamination. The Ni 2p spectrum (Figure S11c) is divided into Ni 2p<sub>3/2</sub> (856.0 eV) and its satellite (861.7 eV), as well as Ni 2p<sub>1/2</sub> (873.6 eV) and its satellite (879.6 eV). In the O1s spectrum (Figure S11d), the peaks at 531.2 eV are assigned to the Ni-O-H bond. All these results are in complete agreement with the fact that the  $\text{Ni(OH)}_2$  is uniformly grown upon the surface of NF.

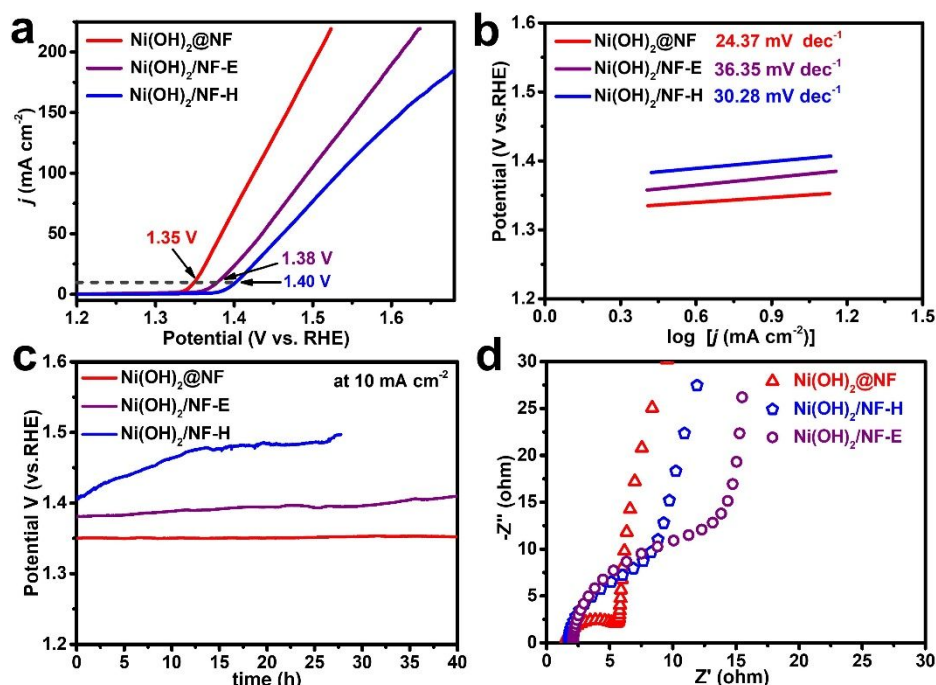

**Figure S12.** (a) Polarization curves of  $\text{Ni(OH)}_2@\text{NF}$ ,  $\text{Ni(OH)}_2/\text{NF-E}$  and  $\text{Ni(OH)}_2/\text{NF-H}$  in 1.0 M KOH with 0.3 M urea at a scan rate of 5 mV s<sup>-1</sup>; (b) Corresponding Tafel plots; (c) Chronopotentiometry plots of  $\text{Ni(OH)}_2@\text{NF}$ ,  $\text{Ni(OH)}_2/\text{NF-E}$  and  $\text{Ni(OH)}_2/\text{NF-H}$  electrode obtained in constant current ( $j = 10 \text{ mA cm}^{-2}$ ); (d) Nyquist plots of  $\text{Ni(OH)}_2@\text{NF}$ ,  $\text{Ni(OH)}_2/\text{NF-E}$  and  $\text{Ni(OH)}_2/\text{NF-H}$  samples.



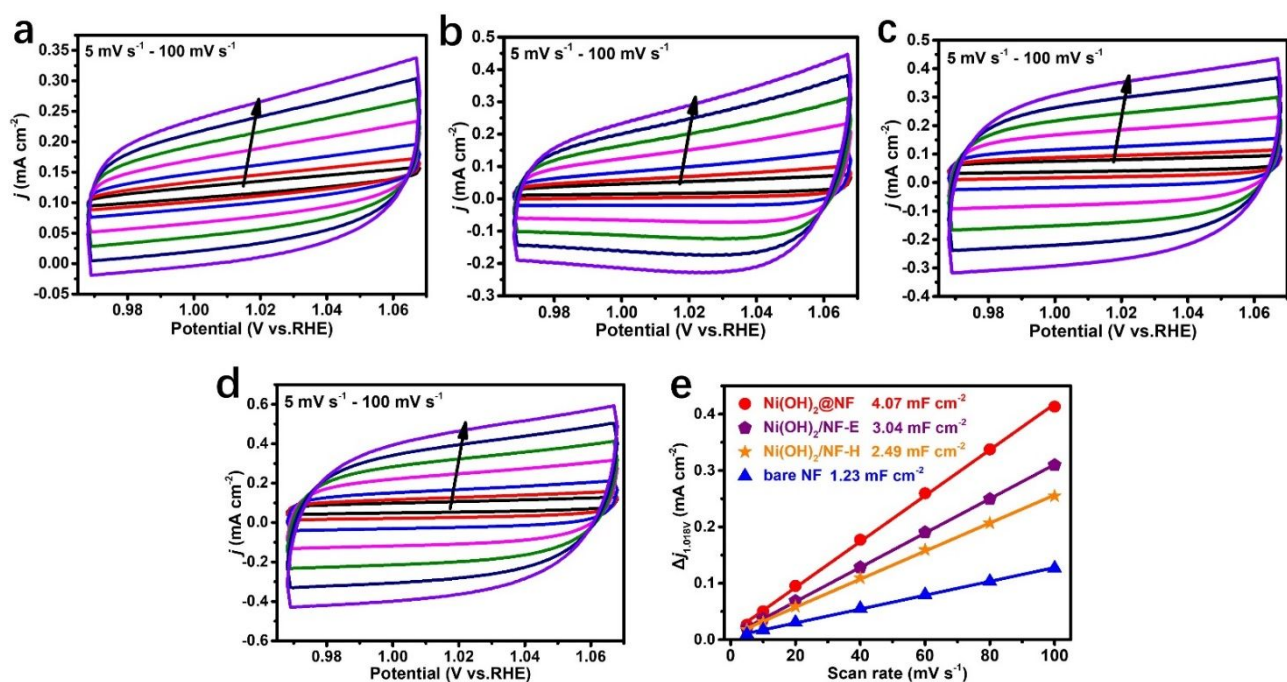

**Figure S13.** CVs of (a) bare NF, (b) Ni(OH)<sub>2</sub>/NF-H, (c) Ni(OH)<sub>2</sub>/NF-E and (d) Ni(OH)<sub>2</sub>@NF at the different scan rates from 5~100 mV s<sup>-1</sup> in the potential rang of 0.968~1.068 V (vs. RHE); (e) Plots of capacitive currents at 1.018V (vs. RHE) as a function of scan rate for the bare NF, Ni(OH)<sub>2</sub>/NF-H, Ni(OH)<sub>2</sub>/NF-E and Ni(OH)<sub>2</sub>@NF.

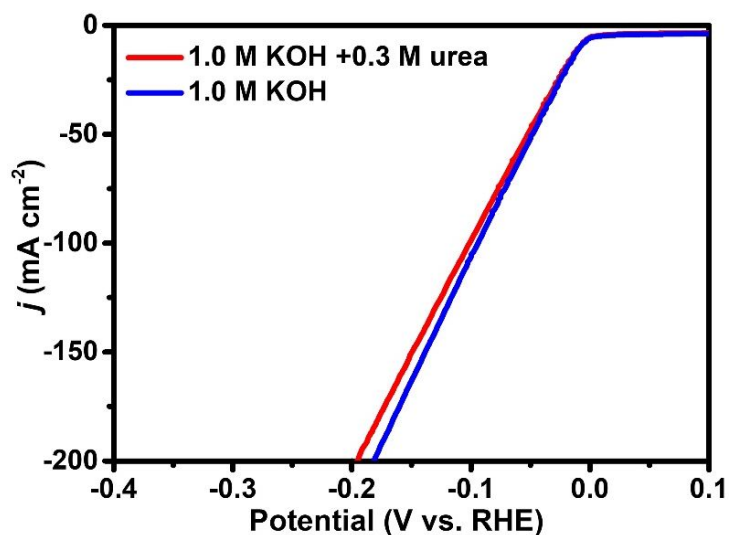

**Figure S14.** LSV curves of Pt/C-NF in 1.0 M KOH with and without 0.3 M urea.

### Section 3

**Table S1.** Comparison of the values of required potential at 10 mA cm<sup>-2</sup> and Tafel slope of Ni(OH)<sub>2</sub>@NF with other reported UOR electrocatalysts.

| Catalytic material                         | Electrolyte              | Potential<br>@10 mA cm <sup>-2</sup><br>(V vs. RHE) | Tafel slope<br>(mV dec <sup>-1</sup> ) | Reference                                                        |
|--------------------------------------------|--------------------------|-----------------------------------------------------|----------------------------------------|------------------------------------------------------------------|
| Ni(OH) <sub>2</sub> @NF                    | 1.0 M KOH<br>0.3 M urea  | 1.35                                                | 24.37                                  | This Work                                                        |
| Pt/C-NF                                    | 1.0 M KOH<br>0.3 M urea  | 1.37                                                | 30.69                                  | This Work                                                        |
| Ni(OH) <sub>2</sub> -CFC                   | 1.0 M KOH<br>0.33M urea  | 1.42                                                | N.A.                                   | <i>Electrochim. Acta</i> , 2017, <b>254</b> , 44-49.             |
| Ni <sub>3</sub> Se <sub>4</sub> nanorod/NF | 1.0 M KOH<br>0.5 M urea  | 1.38                                                | N.A.                                   | <i>J. Mater. Chem. A.</i> , 2018, <b>6</b> , 15653-15658.        |
| Ni-Mo nanotube/NF                          | 1.0 M KOH<br>0.1 M urea  | 1.36                                                | 55                                     | <i>Nano Energy</i> , 2019, <b>60</b> , 894-902.                  |
| NiMoO-Ar/NF                                | 1.0 M KOH<br>0.5 M urea  | 1.37                                                | 19                                     | <i>Energy Environ. Sci.</i> , 2018, <b>11</b> , 1890-1897        |
| Ni/C                                       | 1.0 M KOH<br>0.33 M urea | ~1.38                                               | N.A.                                   | <i>ACS Appl. Mater. Interfaces</i> , 2018, <b>10</b> , 4750-4756 |
| SL Ni(OH) <sub>2</sub> NS/CC               | 1.0 M KOH<br>0.33M urea  | ~1.37                                               | N.A.                                   | <i>J. Mater. Chem. A.</i> , 2018, <b>6</b> , 13867-13873.        |
| NF@p-Ni                                    | 1.0 M KOH<br>0.33M urea  | ~1.38                                               | N.A.                                   | <i>Electrochim. Acta</i> , 2019, <b>304</b> , 131-137.           |
| Ni-MOF/NF                                  | 1.0 M KOH<br>0.5 M urea  | 1.37                                                | N.A.                                   | <i>Chem. Commun.</i> , 2017, <b>53</b> , 10906-10909.            |
| Ni(OH) <sub>2</sub><br>NS@NW/NF            | 1.0 M KOH<br>0.33 M urea | 1.40                                                | 47                                     | <i>Electrochim. Acta</i> , 2018, <b>268</b> , 211-217.           |

**Table S2.** The summary of the values of required potential at 10 mA cm<sup>-2</sup> and Tafel slope of Ni(OH)<sub>2</sub>@NF with different activation time.

| Time (min) | Potential<br>@10 mA cm <sup>-2</sup> (V vs. RHE) | Tafel slope<br>(mV dec <sup>-1</sup> ) |
|------------|--------------------------------------------------|----------------------------------------|
| 15         | 1.352                                            | 25.27                                  |
| 30         | 1.356                                            | 27.84                                  |
| 60         | 1.350                                            | 24.37                                  |
| 90         | 1.358                                            | 27.77                                  |
| 120        | 1.362                                            | 35.55                                  |
